# Supplementary material
Source: publisher figshare collection journal article supplement (https://tandf.figshare.com/ndownloader/files/36009966)
Supplement: Supplementary file 1 [file 36009966]

## Sheet: U-Pb data
Supplemental Table 1: In situ U-Pb isotope and trace elements measurements Analyses were conducted using a SHRIMP-RG at Stanford University.															SHRIMP-RG detection limit is 48Ti=015 ppb, 49Ti=2 ppb, 89Y=0.2 ppb, REE's=0.5-3.8 ppb, Hf=4 ppb, 206Pb=1.5 ppb, Th=0.7 ppb, U=0.7 ppb.
Spot Name		ppm	ppm	232Th/238U	Total		Total						207corr
	% com 206	U	Th		238/206	% err	207/206	% err	238/206*	% err	207*/206*	% err	206Pb/238U Age	1s err	48Ti (ppm)	49Ti (ppm)	48Temp (1.0/0.7)	Y (ppm)	La (ppm)	Ce (ppm)	Nd (ppm)	Sm (ppm)	Eu (ppm)	Gd (ppm)	Dy (ppm)	Er (ppm)	Yb (ppm)	Hf (ppm)	La (ch)	Ce (ch)	Nd (ch)	Sm (ch)	Eu (ch)	Gd (ch)	Dy (chn)	Er (ch)	Yb (ch)	Y (ch)	Eu/Eu* (Ch)
Mount TG-4
Elijah-3 EL-45
EL-45-1.1	0.38	124	62	0.516	30.64	1	0.0533	5.3	30.34	1.1	0.0611	8.6	206	2	10.4	10.1	821	2027.03	0.0473295	7.75064	5.3984	10.3284	3.83511	84.4212	248.357	354.152	464.335	8135.86	0.199702	12.6438	11.8127	69.7863	68.1191	424.227	1009.58	2213.45	2884.07	1291.1	0.395899
EL-45-2.1	0.27	104	44	0.435	31.2	1.1	0.0523	5.1	31.45	1.2	0.0461	11.3	203	2	8.1	8	795	709.337	0.011003	9.1614	0.986532	2.0809	0.802523	22.8256	78.181	128.955	180.866	8951.06	0.0464263	14.9452	2.15871	14.0601	14.2544	114.702	317.809	805.969	1123.39	451.807	0.354952
EL-45-3.1	-0.047	79	33	0.436	30.6	1.2	0.0499	6	30.45	1.3	0.0538	9.1	207	3	11.8	11.6	835	719.31	0.299133	12.0926	1.78082	2.99858	1.32112	26.8459	81.5724	125.186	173.829	8336.67	1.26217	19.727	3.89677	20.2606	23.4657	134.904	331.595	782.41	1079.68	458.159	0.448843
EL-45-4.1	-0.253	100	58	0.595	30.75	1.1	0.0483	5.7	30.63	1.2	0.0515	8.2	207	2	11	10.3	828	1479.12	0.022714	28.99	2.48581	4.50294	1.27193	52.3966	169.227	265.186	362.67	9420.26	0.0958395	47.292	5.43942	30.4253	22.5921	263.299	687.914	1657.41	2252.61	942.115	0.252414
EL-45-5.1	0.004	258	150	0.599	30.96	0.8	0.0503	3.3	30.96	0.8	0.0503	3.3	205	2	5.7	5.4	761	764.936	0.0498426	8.87951	1.08762	2.54509	0.917772	26.1399	89.2081	136.52	195.916	9107.1	0.210306	14.4853	2.3799	17.1966	16.3015	131.356	362.635	853.247	1216.87	487.22	0.342989
EL-45-6.1	0.399	108	52	0.495	31.15	1	0.0534	5.1	31.64	1.3	0.041	16.7	203	2	11.7	11.6	835	1433.39	0.0453139	5.22127	3.74089	5.72671	2.08035	59.3952	168.998	242.535	337.305	8286.67	0.191198	8.51757	8.18575	38.694	36.9512	298.468	686.984	1515.85	2095.06	912.987	0.343841
EL-45-7.1	-0.545	144	100	0.72	31.5	1.8	0.0458	4.6	31.92	1.9	0.0351	15.1	203	4	10.9	10.4	826	1240.88	0.0130587	14.6621	1.86381	3.67062	1.15452	43.0805	139.388	225.741	329.095	9496.56	0.0551	23.9186	4.07836	24.8015	20.5066	216.485	566.617	1410.88	2044.07	790.368	0.27986
EL-45-8.1	-0.099	154	64	0.428	30.63	0.9	0.0495	4.3	31.02	1.1	0.0392	13.1	207	2	5.5	5.5	757	576.343	0.0113835	5.36957	0.852859	1.89384	0.689137	17.8817	59.7379	102.304	156.737	8623.16	0.0480317	8.75949	1.86621	12.7962	12.2404	89.858	242.837	639.402	973.519	367.098	0.360975
Elijah-3 NG-44
EL -44-1.1	0.358	134	81	0.621	30.9	1.6	0.0531	4.8	30.9	1.6	0.0531	4.8	205	3	9.1	9	807	1554.19	0.158745	8.93823	4.09969	6.84781	2.3394	62.6513	185.894	273.67	351.241	8228.95	0.669812	14.5811	8.97087	46.269	41.5524	314.831	755.665	1710.44	2181.62	989.928	0.344281
EL -44-2.1	-0.224	72	30	0.427	31.11	2	0.0484	7	31.98	2.4	0.0261	41.7	204	4	10.4	10.1	822	594.797	0.0128263	4.7666	0.870799	1.93348	0.716928	20.1204	65.3566	107.001	158.656	7851.79	0.0541193	7.77586	1.90547	13.064	12.7341	101.107	265.677	668.759	985.438	378.852	0.350378
EL -44-3.1	-0.563	82	48	0.602	30.8	1.9	0.0458	6.6	31.37	2.1	0.0308	26.8	207	4	10.3	9.7	821	1312.18	0.0450143	5.48819	3.23989	6.1968	2.09063	57.0979	160.901	227.611	307.614	8630.98	0.189934	8.95301	7.08947	41.8703	37.1338	286.924	654.068	1422.57	1910.65	835.781	0.338792
EL -44-4.1	-0.044	1266	867	0.708	31.78	2.1	0.0498	1.4	31.83	2.1	0.0486	1.8	200	4	6.1	5.8	766	2749.39	0.291313	49.4637	3.71049	7.76915	0.632302	82.6253	291.845	495.898	735.828	9235.91	1.22917	80.6912	8.11924	52.4943	11.2309	415.203	1186.36	3099.36	4570.36	1751.2	0.076073
EL -44-5.1	-0.559	61	22	0.378	31.43	1.3	0.0457	12	31.63	1.5	0.0405	18.9	203	3	6.9	6.6	779	482.533	0.0092798	6.58168	0.530009	1.33162	0.45889	14.9654	52.0819	91.3215	132.636	9409.11	0.0391553	10.7368	1.15976	8.99744	8.15079	75.2031	211.715	570.76	823.826	307.346	0.313345
EL -44-6.1	0.933	113	53	0.484	31.15	1	0.0576	4.7	30.94	1.1	0.063	7.4	202	2	8.8	8.5	804	762.004	0.0112679	9.40263	1.13817	2.31394	0.801809	24.2081	85.5097	137.408	202.444	9117.63	0.0475439	15.3387	2.49052	15.6348	14.2417	121.649	347.6	858.798	1257.41	485.353	0.32656
EL -44-7.1	-0.03	210	89	0.44	30.94	0.8	0.05	3.8	31.13	0.9	0.045	7.8	205	2	7.1	6.9	781	794.16	0.0765326	8.33675	0.879545	1.9784	0.299903	21.2196	79.7097	144.555	230.939	10121	0.322922	13.5999	1.92461	13.3676	5.32688	106.631	324.023	903.468	1434.41	505.834	0.141093
EL -44-8.1	-0.038	100	45	0.466	30.36	1.1	0.05	5.5	30.73	1.3	0.0401	16	209	2	9.7	9.2	815	742.677	0.0847188	9.90605	1.15033	2.48138	0.763517	24.7259	83.6085	136.277	193.999	9185.28	0.357463	16.1599	2.51712	16.7661	13.5616	124.251	339.872	851.73	1204.96	473.043	0.297129
EL -44-9.1	-0.403	105	64	0.628	32.24	1.6	0.0469	5.5	32.11	1.7	0.05	8.1	198	3	10.8	10.4	826	1540.4	0.0576711	6.36069	4.06548	7.39277	2.47352	65.6355	184.383	272.63	359.194	8615.38	0.243338	10.3763	8.89602	49.9511	43.9346	329.827	749.523	1703.94	2231.02	981.148	0.342287
EL -44-10.1	0.283	85	38	0.457	31.95	2.3	0.0523	5.8	31.95	2.3	0.0523	5.8	198	5	11	10.7	828	799.322	0.0107816	6.04756	1.40654	2.92318	1.06963	27.7797	89.3634	142.974	215.98	8595.63	0.045492	9.86551	3.07777	19.7512	18.9988	139.597	363.266	893.589	1341.49	509.122	0.361821
EL -44-11.1	-0.137	309	181	0.604	30.72	1.9	0.0492	4.7	30.84	1.9	0.0461	6.1	207	4	6.5	6.3	773	1586.92	1.3555	29.2915	3.37262	5.02437	1.78387	53.0551	179.49	287.186	391.894	9587.18	5.71939	47.7839	7.37991	33.9484	31.685	266.608	729.633	1794.91	2434.13	1010.78	0.333048
EL -44-12.1	0.167	105	51	0.502	31.78	2.1	0.0515	5.2	31.43	2.2	0.0604	9.5	199	4	9.2	8.8	809	1013.82	0.0140189	7.7041	1.88449	3.82083	1.41559	34.5883	117.695	178.819	252.829	9039.79	0.0591516	12.5679	4.12361	25.8164	25.1438	173.811	478.437	1117.62	1570.37	645.742	0.375357
EL -44-13.1	-0.271	159	88	0.57	31.89	1.8	0.048	7.5	31.89	1.8	0.048	7.5	200	4	5.4	5	755	1895.79	0.0386558	12.6384	4.40174	8.14074	2.7963	75.7695	232.393	333.959	443.22	10079.4	0.163105	20.6173	9.63181	55.005	49.6679	380.751	944.689	2087.24	2752.92	1207.51	0.343205
EL -44-14.1	-0.002	352	314	0.92	31.05	1	0.0502	2.8	31.05	1	0.0502	2.8	204	2	10.7	10.4	825	5316.39	0.202887	38.8477	19.1423	31.2244	11.0893	254.84	673.816	926.187	1144.3	7686.29	0.856065	63.373	41.8868	210.976	196.967	1280.6	2739.09	5788.67	7107.46	3386.24	0.37894
EL -44-15.1	0.007	210	154	0.759	30.68	0.9	0.0503	3.4	30.63	0.9	0.0517	4.2	207	2	8	7.6	794	2589.33	0.0605719	16.1822	5.62948	10.4665	3.72304	112.78	320.877	439.227	568.183	9065.71	0.255578	26.3983	12.3183	70.7197	66.1286	566.731	1304.38	2745.17	3529.09	1649.26	0.330317
EL -44-16.1	0.712	72	29	0.417	31.57	1.4	0.0558	5.9	31.74	1.5	0.0515	10.6	200	3	8.9	8.6	805	663.353	0.0102689	6.12125	0.912864	2.12984	0.767076	23.573	73.9827	119.104	176.556	8962.52	0.0433287	9.98573	1.99752	14.3908	13.6248	118.457	300.743	744.403	1096.62	422.518	0.329994
EL -44-17.1	0.04	177	92	0.535	30.81	2.5	0.0506	4.2	30.67	2.5	0.0543	6.2	206	5	4.3	4.3	734	1854.45	0.0208253	13.0434	3.90726	6.62378	2.18697	67.5899	214.285	331.317	437.438	10152.4	0.0878703	21.278	8.54981	44.7553	38.8449	339.648	871.076	2070.73	2717.01	1181.18	0.315063
EL -44-18.1	0.507	208		0.442	30.58	1.3	0.0543	3.6	30.41	1.3	0.0588	5.5	206	3	4.6	4.2	740	1038.54	0.0335184	16.6185	1.14348	2.7026	0.85258	30.832	113.124	186.876	268.946	10382.3	0.141428	27.1101	2.50214	18.2608	15.1435	154.935	459.855	1167.97	1670.47	661.488	0.284703
EL -44-19.1	-0.482	78	33	0.435	30.73	1.2	0.0464	6.2	30.89	1.3	0.0423	11.9	207	3	11.7	11.3	835	602.426	0.0241143	5.83422	0.939844	2.09855	0.834205	19.8226	66.6555	107.629	157.982	8060.73	0.101748	9.51748	2.05655	14.1794	14.8171	99.6111	270.957	672.68	981.253	383.711	0.394259
Elijah-3 EL-39
EL-39-1.1	1.304	64	24	0.39	31.43	2.9	0.0605	6.5	31.61	2.9	0.056	10.7	199	6	9.3	9.1	809	679.953	0.152308	7.62758	1.25794	2.55204	0.778255	23.3442	76.6681	125.922	197.318	6497.93	0.642651	12.443	2.7526	17.2435	13.8234	117.308	311.659	787.015	1225.58	433.091	0.307353
EL-39-2.1	0.194	255	205	0.831	30.86	0.8	0.0518	3.7	31.27	0.9	0.0414	10.1	205	2	11.6	11.2	833	3877.54	0.147248	21.2348	13.2724	21.6539	5.09238	172.611	458.192	656.338	852.145	7000.61	0.621298	34.6408	29.0426	146.31	90.4508	867.39	1862.57	4102.11	5292.82	2469.77	0.253903
EL-39-3.1	-0.239	235	154	0.678	32.05	2.5	0.0482	4.1	32	2.5	0.0496	4.9	199	5	12.7	12	844	2299.25	5.35543	20.759	9.86415	11.6247	2.51561	100.071	278.324	408.603	559.214	7878.17	22.5968	33.8647	21.5846	78.5451	44.6823	502.868	1131.4	2553.77	3473.38	1464.49	0.224827
EL-39-4.1	0.026	422	264	0.647	30.87	1	0.0505	2.8	30.73	1	0.0539	4.2	205	2	6.9	6.7	779	1331.21	1.23569	29.0882	2.58169	3.79244	0.566935	38.3194	136.524	245.367	365.986	9299.92	5.21388	47.4522	5.64921	25.6246	10.0699	192.56	554.975	1533.55	2273.21	847.907	0.143355
EL-39-5.1	0.178	715	380	0.55	31.38	1.2	0.0516	2	31.4	1.2	0.0511	2.2	202	2	6.7	6.1	776	2113.51	0.686635	28.0309	3.23871	5.14762	0.870598	52.994	209.235	379.068	586.464	9941.67	2.89719	45.7274	7.0869	34.7812	15.4636	266.302	850.548	2369.17	3642.64	1346.19	0.160676
EL-39-6.1	-0.121	269	138	0.529	31.53	1.6	0.0492	3.2	31.53	1.6	0.0492	3.2	202	3	7.5	7.5	787	983.295	0.640035	12.2754	1.7925	2.7107	0.411219	28.0222	101.049	174.16	274.713	8425.79	2.70057	20.0251	3.92233	18.3156	7.30407	140.815	410.768	1088.5	1706.29	626.303	0.143824
EL-39-7.1	0.063	951	1083	1.177	30.84	0.8	0.0508	1.7	30.87	0.8	0.0501	1.9	206	2	9.9	9.6	816	6705.1	1.19738	88.6178	27.1695	35.9313	7.7628	267.417	768.175	1162.67	1703.85	7480.66	5.05223	144.564	59.4518	242.779	137.883	1343.8	3122.66	7266.66	10582.9	4270.76	0.241399
Elijah-3 EL-38
EL-38-1.1	0.521	188	78	0.43	31.59	1.6	0.0543	4.4	31.59	1.6	0.0543	4.4	200	3	8	7.5	793	913.463	0.26044	8.92388	1.17454	2.4331	0.41581	24.7927	94.3059	165.777	264.451	9954.96	1.0989	14.5577	2.57012	16.4398	7.38561	124.587	383.357	1036.11	1642.55	581.823	0.163193
EL-38-2.1*	0.174	138	68	0.512	27.54	1.7	0.0522	5.4	27.9	1.9	0.0416	16.4	230	4				852.572	2.70412	18.1187	2.998	3.68117	0.826681	30.4327	84.4472	141.684	206.711	6203.38	11.4098	29.5574	6.56016	24.8728	14.6835	152.928	343.281	885.523	1283.92	543.039	0.238081
EL-38-3.1	-0.751	100	58	0.594	31.26	1.1	0.0442	5.8	31.26	1.1	0.0442	5.8	204	2	9.5	9.1	812	1827.88	0.0852189	8.96407	4.85093	8.60485	2.76919	77.6857	226.28	320.494	437.474	6489.74	0.359573	14.6233	10.6147	58.1409	49.1863	390.381	919.839	2003.09	2717.23	1164.25	0.326482
EL-38-4.1	0.078	152	103	0.7	31.02	0.9	0.0509	4.3	30.95	0.9	0.0529	5.6	204	2	11	10.8	828	2627.58	0.123674	15.8652	10.3293	14.9877	5.05051	122.344	325.509	450.293	598.084	6742.12	0.521832	25.8813	22.6024	101.268	89.7071	614.795	1323.21	2814.33	3714.81	1673.62	0.359522
EL-38-5.1	-0.478	127	102	0.833	31.67	1	0.0463	4.9	31.77	1	0.0438	7.8	201	2	13.7	13.2	852	768.588	0.0298522	7.4467	1.20883	2.57477	0.838356	25.6602	85.1167	139.142	202.243	8130.07	0.125959	12.148	2.64514	17.3971	14.8909	128.946	346.003	869.639	1256.17	489.546	0.314397
EL-38-6.1*	32.664	114	64	0.582	21.92	7.5	0.3108	13.2	29.56	8.7	0.1235	51.8	195	21				578.015	35.3317	57.8402	10.0468	3.51704	0.674123	20.656	62.0177	106.332	163.849	7801.35	149.079	94.3559	21.9843	23.7638	11.9738	103.799	252.104	664.572	1017.7	368.162	0.241089
Elijah-3 EL-28
EL-28-1.1	0.286	678	600	0.914	21.65	0.6	0.0544	1.7	21.67	0.6	0.0535	2	290	2	2.7	2.6	692	4114.45	0.331197	150.262	3.30314	10.898	4.0798	149.293	510.741	721.042	797.411	5807.32	1.39746	245.126	7.22788	73.6352	72.4653	750.216	2076.18	4506.51	4952.87	2620.67	0.308315
EL-28-2.1	0.244	114	59	0.533	21.42	1.1	0.0542	7.8	21.32	1.1	0.058	8.7	293	3	4.7	4.5	743	1060.56	0.0232227	27.5192	1.04027	2.80426	1.01306	30.3999	117.42	194.045	260.95	7849.21	0.0979861	44.8927	2.2763	18.9477	17.9939	152.763	477.315	1212.78	1620.81	675.517	0.334455
EL-28-3.1	-0.325	194	89	0.472	22.19	0.8	0.0494	3.2	22.16	0.9	0.0506	3.9	285	2	4.5	4.1	738	2322.2	0.0414828	55.1576	2.56473	5.89094	2.18544	68.7707	256.401	426.963	558.544	6965.19	0.175033	89.9798	5.61211	39.8037	38.8177	345.581	1042.28	2668.52	3469.21	1479.11	0.330974
EL-28-4.1	0.326	299	147	0.51	21.72	1.4	0.0547	2.4	21.74	1.4	0.054	2.8	289	4	3	2.9	702	4686.59	0.279521	56.5679	5.89028	13.677	6.4395	170.71	596.944	856.79	887.981	5775.94	1.17941	92.2804	12.889	92.412	114.378	857.84	2426.6	5354.94	5515.41	2985.09	0.406234
EL-28-5.1	0.09	427	480	1.162	31.68	0.7	0.0509	2.6	31.74	0.7	0.0493	3.5	200	1	12.1	11.9	838	1148.31	0.0597204	75.1563	3.07532	4.0448	3.67911	32.9098	102.473	199.272	356.117	7146.92	0.251985	122.604	6.72937	27.3297	65.3483	165.376	416.558	1245.45	2211.91	731.405	0.972032
EL-28-6.1	-0.155	766	330	0.445	30.94	0.9	0.049	1.9	30.94	0.9	0.049	1.9	205	2	2.6	2.8	691	775.572	0.0143765	17.3118	0.452523	1.06696	0.404145	13.0316	63.5692	146.403	309.811	11930.6	0.0606603	28.2411	0.990204	7.20918	7.17842	65.4855	258.412	915.02	1924.29	493.995	0.33038
Mount TG-4 Standards
TEM-1.1	-0.0857062	247.876	66.9413	0.278971	0.13221	4.1102	0.0544437	2.03519	0.0657677	1.12295	0.0538632	2.32401	410.607	4.46712
TEM-2.1	-0.62124	126.185	63.3018	0.518215	0.128809	4.39688	0.0501136	4.18062	0.0663165	2.0239	0.0478219	5.55419	413.926	8.11413
TEM-3.1	-0.19592	173.395	81.5052	0.485568	0.127435	4.35385	0.0535526	2.885	0.06598	1.2144	0.0510413	4.16408	411.891	4.84556
TEM-4.1	-0.18462	262.967	76.0839	0.298877	0.123308	3.74349	0.053644	2.30475	0.0660058	1.46615	0.0546783	2.62384	412.047	5.85219
TEM-5.1	0.209013	237.115	75.7734	0.330109	0.130149	3.04215	0.0568268	2.45	0.0657211	1.011	0.0562053	2.71476	410.325	4.01911
TEM-6.1	-0.0330886	310.694	74.4392	0.247496	0.121484	4.16204	0.0548692	2.06999	0.0671343	0.991676	0.0559268	2.4284	418.868	4.02174
TEM-7.1	0.0103199	315.528	118.868	0.389158	0.117218	4.98204	0.0552202	1.99044	0.0625393	0.589863	0.0561659	2.28798	391.05	2.23809
TEM-8.1	0.0911811	171.715	89.2743	0.537054	0.128755	3.46518	0.055874	2.97252	0.0665967	0.758585	0.0522391	4.73435	415.619	3.05334
TEM-9.1	-0.0489457	228.2	102.041	0.461912	0.116799	3.46857	0.054741	2.35338	0.067914	0.702875	0.0533952	3.00459	423.576	2.88151
TEM-10.1	0.0924668	112.236	55.5951	0.511687	0.132941	3.48347	0.0558844	3.35895	0.0669783	0.933993	0.0586026	4.56917	417.925	3.77955
TEM-11.1	0.102438	414.246	218.449	0.544743	0.121207	3.34387	0.055965	1.77933	0.0666654	0.487828	0.055565	1.9323	416.034	1.96543
TEM-12.1	-0.318047	177.853	86.0617	0.499862	0.130279	3.63732	0.0525651	2.80077	0.0673798	0.752461	0.0534567	3.21619	420.35	3.06205
TEM-13.1	0.016851	250.001	70.0835	0.289583	0.130596	3.49921	0.055273	2.29348	0.0669324	0.639026	0.0539792	2.90079	417.648	2.58426
TEM-14.1	0.17526	259.257	82.1029	0.327136	0.13269	3.83562	0.0565539	2.16096	0.0663998	0.617785	0.0559593	2.43046	414.429	2.47972
TEM-15.1	0.437282	94.2498	26.6267	0.291835	0.127912	3.88536	0.0586725	3.64171	0.067036	1.03155	0.0620377	5.13366	418.273	4.17769
TEM-16.1	0.206499	297.38	71.6979	0.249055	0.135962	4.58268	0.0568064	2.75656	0.0664711	0.798792	0.0568064	2.75656	414.86	3.20949
TEM-17.1	-0.331228	156.121	77.595	0.51342	0.132804	3.59561	0.0524585	3.80742	0.0680644	1.07621	0.0524585	3.80742	424.484	4.42116
MAD-559 -1.1	-0.0149333	3283.61	374.991	0.117969	0.0831794	1.68589	0.0576933	0.469128	0.0831736	0.546605	0.0576611	0.472717	515.038	8.4835				404	0.011	12.3	0.56	1.78	0.324	12.3	38.8	61	124	15698	0.0464135	20.0653	1.22538	12.027	5.75488	61.809	157.724	381.25	770.186	257.325	0.211072
Mount TG-1
Atlit-1A
zr-2-1.1	0.029	1100	1611	1.51	30.7	1.3	0.0505	1.3	30.8	1.3	0.0501	1.5	206	3				5706.19	0.272081	288.776	11.9233	36.4809	9.26524	285.214	786.432	872.364	977.453	7653.13	1.14802	471.086	26.0903	246.493	164.569	1433.24	3196.88	5452.28	6071.14	3634.52	0.276877
zr-3-1.1	-0.144	365	354	1	30.7	1.2	0.0491	2.5	30.8	1.2	0.0479	3.2	207	2				2980.27	0.0819147	64.9057	5.5184	14.9934	4.61827	127.252	383.873	483.954	605.625	7699.21	0.345632	105.882	12.0753	101.307	82.0297	639.456	1560.46	3024.71	3761.65	1898.26	0.322289
Mount TG-1 standards
R33-1.1	0.137527	571.799	431.453	0.779455	0.11568	3.27989	0.056303	1.29622	0.0669924	1.92834	0.0557408	1.43397	418.01	7.80488
R33-2.1	-0.257474	170.162	86.4116	0.524577	0.117471	3.81811	0.0531093	2.37776	0.0674385	2.04249	0.0488896	4.18301	420.705	8.31846
R33-3.1	-0.0372911	250.018	212.26	0.876996	0.121377	3.51802	0.0548896	1.8401	0.0674201	2.37302	0.0522856	2.81368	420.594	9.66215
R33-4.1	0.0384449	202.004	130.534	0.667519	0.114218	3.37025	0.0555019	2.26298	0.0670493	0.615218	0.0549461	2.50141	418.354	2.49205
MAD-1-1.1	-0.0149333	4127.45	1271.56	0.31824	0.162994	2.42075	0.0584615	0.374728	0.0891507	1.14429	0.0583913	0.381575	550.637	6.1491				959.821	0.0404281	140.106	2.26205	4.45399	0.374065	26.3544	85.2147	153.001	326.011	16277.4	0.170583	228.559	4.94979	30.0945	6.64414	132.434	346.401	956.257	2024.91	611.351	0.105243
Mount TG-9
Devorah volcanics
DB2A-1.1	0.07	346	107	0.32	65.52	1.8	0.0486	4.1	65.77	1.8	0.0456	7.4	97.6	2	2.2	2.2	648	681.988	0.0209991	10.246	0.314159	1.48863	0.187127	11.9004	57.1711	121.895	245.574	11120.2	0.0886039	16.7145	0.687439	10.0583	3.32375	59.8008	232.403	761.846	1525.31	434.387	0.135522
DB2A-2.1*	0.53	460	365	0.82	49.55	0.7	0.0528	2.9	49.41	0.8	0.0551	4.3	128	1				4371.78	0.338996				1.11908	171.134	486.927	695.925	948.854	6320.32	1.43036				19.8772	859.969	1979.38	4349.53	5893.5	2784.58
DB2A-3.1*	0.04	163	70	0.45	2.96	0.9	0.1152	0.8	2.96	0.9	0.1149	0.8	1877	17				1057.66	0.137696	8.8115	5.20638	8.27492	1.09258	43.8421	112.505	169.964	262.723	7929.23	0.580995	14.3744	11.3925	55.9116	19.4065	220.312	457.337	1062.28	1631.82	673.669	0.174854
DB2A-5.1*	-0.11	177	52	0.3	81.97	0.9	0.0467	6.4	82.64	1.2	0.0402	18	78.3	0.8				293.144	0.0272133	15.0139	0.382745	0.718352	0.460804	6.06252	24.6699	51.6436	129.786	9965.07	0.114824	24.4924	0.837516	4.85373	8.18479	30.4649	100.284	322.773	806.127	186.716	0.673085
DB2A-7.1	0.02	185	109	0.61	46.37	2.3	0.049	4.5	46.41	2.3	0.0483	5.5	138	3	4.5	4.6	705	2557.67	0.15043	21.7252	6.51394	16.5724	2.15456	112.392	307.458	414.327	520.628	7037.5	0.634727	35.4408	14.2537	111.975	38.2692	564.783	1249.83	2589.54	3233.71	1629.09	0.152176
DB2A-9.1	0.28	211	152	0.74	47.42	1.9	0.051	4.1	47.29	1.9	0.0533	6.2	134	2	11.9	12.6	797	2163.55	0.23076	14.2125	4.48875	9.54879	2.81491	73.2878	229.803	355.687	535.127	8186.36	0.973671	23.1851	9.82221	64.5189	49.9984	368.28	934.158	2223.04	3323.77	1378.06	0.324357
DB2A-10.1	-0.05	1161	1997	1.78	46.66	0.6	0.0484	1.8	46.81	0.6	0.0457	3.2	137	0.8	9.6	9.7	775	6367.97	0.545052	351.194	26.147	56.9658	3.19134	329.403	796.522	967.06	1104.65	6111.16	2.2998	572.91	57.2144	384.904	56.6845	1655.29	3237.89	6044.13	6861.16	4056.03	0.0710151
DB2A-12.1	-0.02	1447	605	0.43	64.47	0.9	0.0478	1.9	64.52	0.9	0.0473	2.3	99.2	0.9	2	2	641	2304.15	0.0626908	18.9493	2.30458	6.9081	0.62114	47.3143	190.573	395.77	726.206	11077	0.264518	30.9123	5.04283	46.6764	11.0327	237.76	774.686	2473.56	4510.59	1467.61	0.104728
DB2A-13.1	0.21	752	401	0.55	64.97	1.7	0.0496	5.8	65.15	1.7	0.0475	6.9	98.3	2	3.9	3.9	694	2273.77	0.0687919	30.9841	3.64744	8.72353	1.14154	63.8038	215.346	386.88	630.456	10481.3	0.290261	50.545	7.98126	58.9427	20.2761	320.622	875.391	2418	3915.88	1448.26	0.147493
Meged-2
MEG23-1.1	0.33	141	99	0.72	29.39	1	0.0531	4.2	29.52	1.1	0.0494	8.3	215	2				1146.66	6.18645	38.3503	3.26409	5.26925	0.854511	32.6524	113.948	186.106	284.797	7124.86	26.1032	62.5616	7.14244	35.603	15.1778	164.082	463.204	1163.16	1768.93	730.358	0.19858
MEG23-2.1*	0.34	170	119	0.72	8.42	1.8	0.0662	1.7	8.42	1.8	0.0655	2	721	12
Mount TG-9 standards
TEM-1.1	0.0323266	188.98	107.4	0.587068	0.120593	2.62416	0.0553981	4.52947	0.0667424	1.63951	0.0543362	5.02111	416.5	6.61263
TEM-2.1	0.0833515	270.177	167.576	0.640715	0.124554	2.021	0.0558107	2.02297	0.068127	1.10597	0.0558107	2.02297	424.862	4.54734
TEM-3.1	0.0920353	266.647	66.4084	0.257269	0.122757	2.32351	0.0558809	1.99619	0.0684726	1.79968	0.0551544	2.41581	426.947	7.43477
TEM-4.1	-0.0353048	321.713	175.328	0.562968	0.12508	2.8228	0.0548513	1.80022	0.0658407	1.66777	0.0547364	1.86433	411.049	6.64135
TEM-5.1	-0.290971	157.548	43.5679	0.285664	0.126498	3.17212	0.052784	2.64251	0.0668556	1.63444	0.0525478	2.8391	417.184	6.60268
TEM-6.1	0.188015	211.071	95.3516	0.46666	0.112604	2.78147	0.056657	2.20463	0.0666066	0.685479	0.0554016	2.9628	415.679	2.75947
TEM-7.1	0.266267	372.376	76.9189	0.213379	0.123356	3.78056	0.0572897	1.69973	0.06643	1.4324	0.0567663	1.94879	414.612	5.75193
TEM-8.1	0.0700176	3058.37	3330.69	1.12498	0.117097	2.391	0.0557029	0.584569	0.0659679	1.39667	0.0558012	0.599864	411.817	5.57185
TEM-9.1	0.0833805	2398.49	1100.6	0.474016	0.124411	3.14185	0.0558109	0.68399	0.0666268	0.981279	0.0558109	0.68399	415.801	3.95136
TEM-10.1	0.0826417	2153.21	1013.89	0.486413	0.124989	2.56296	0.055805	1.10956	0.0667677	1.56641	0.0557092	1.12263	416.653	6.32006
TEM-11.1	0.272422	175.766	42.8031	0.25156	0.11879	3.72495	0.0573395	2.43912	0.0667843	1.24533	0.0569158	2.72602	416.753	5.02574
MAD-559-1.1	0.0202049	3435	377.887	0.113641	0.152466	2.15385	0.0576854	0.496634	0.0824408	1.72538	0.057538	0.518194	510.666	8.60984				404	0.011	12.3	0.56	1.78	0.324	12.3	38.8	61	124	15698	0.0464135	20.0653	1.22538	12.027	5.75488	61.809	157.724	381.25	770.186	257.325	0.211072
SHRIMP detection limit is 48Ti=015 ppb, 49Ti=2 ppb, 89Y=0.2 ppb, REE's=0.5-3.8 ppb, Hf=4 ppb, 206Pb=1.5 ppb, Th=0.7 ppb, U=0.7 ppb.
